# Supplementary material
Source: publisher figshare collection journal article supplement (https://acs.figshare.com/ndownloader/files/11659511)
Supplement: Supplementary file 1 [file 11659511]

# Supporting Information

## Humidity-Independent Oxide Semiconductor Chemiresistors Using Terbium-Doped SnO<sub>2</sub> Yolk-Shell Spheres for Real-Time Breath Analysis

Chang-Hoon Kwak,<sup>†</sup> Tae-Hyung Kim,<sup>†</sup> Seong-Yong Jeong,<sup>†</sup> Ji-Won Yoon,<sup>†</sup>

Jun-Sik Kim,<sup>†</sup> and Jong-Heun Lee<sup>\*,†</sup>

<sup>†</sup>Department of Materials Science and Engineering, Korea University, Seoul  
02841,  
Republic of Korea

\*Author to whom correspondence should be addressed.

Email: jongheun@korea.ac.kr; Fax: +82-2-928-3584; Tel: +82-2-3290-3282

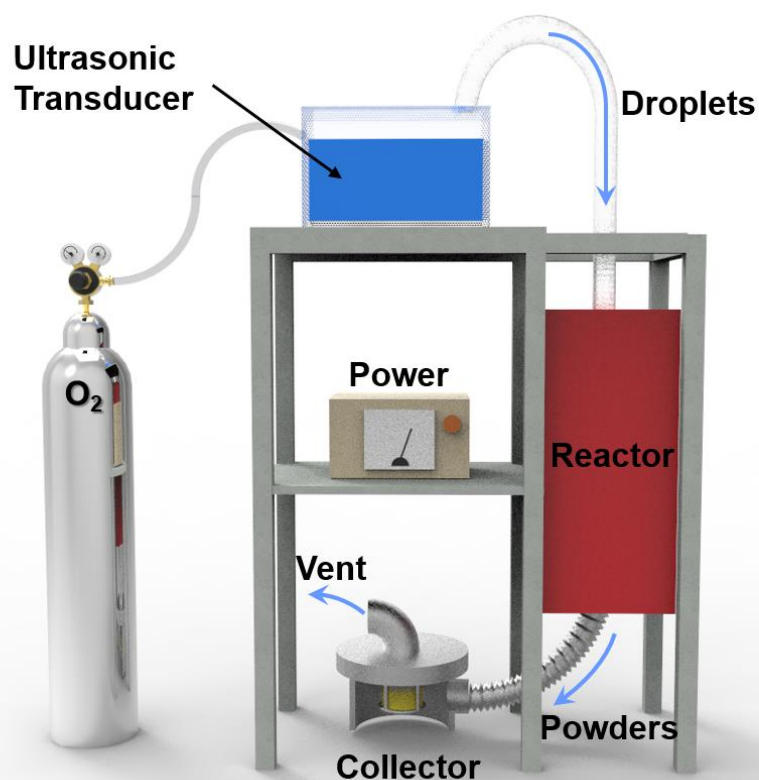

**Figure S1.** Schematic of the ultrasonic spray pyrolysis process for synthesizing yolk-shell spheres.

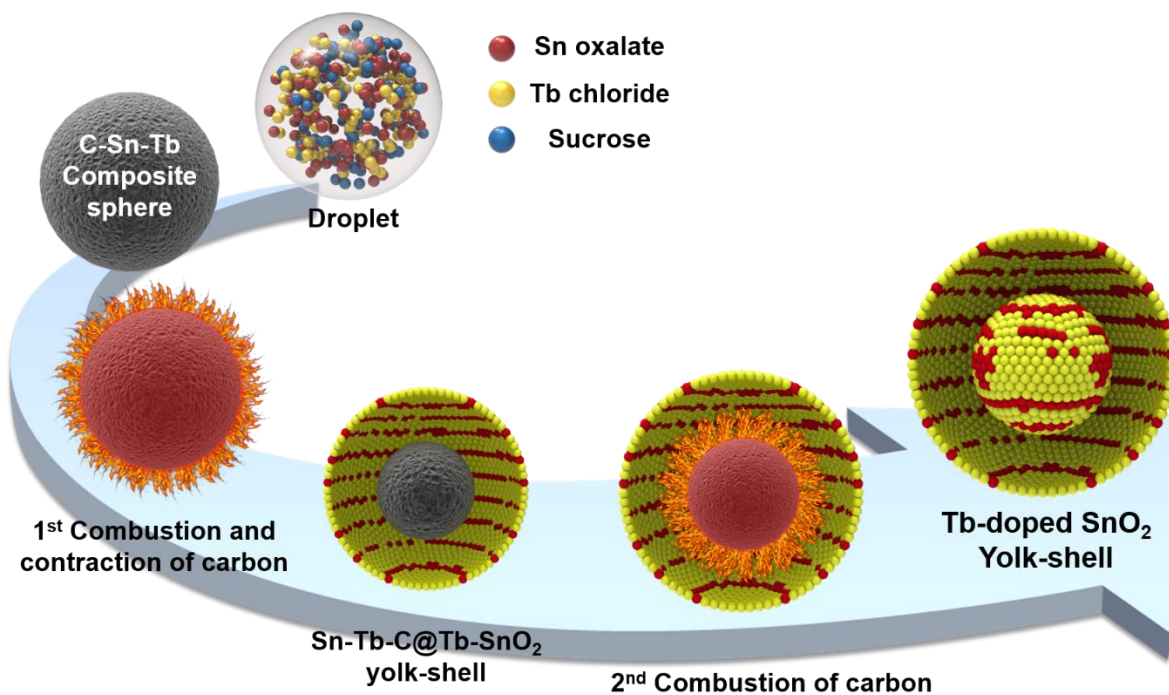

**Figure S2.** Formation mechanism of Tb-doped SnO<sub>2</sub> yolk-shells via spray pyrolysis.

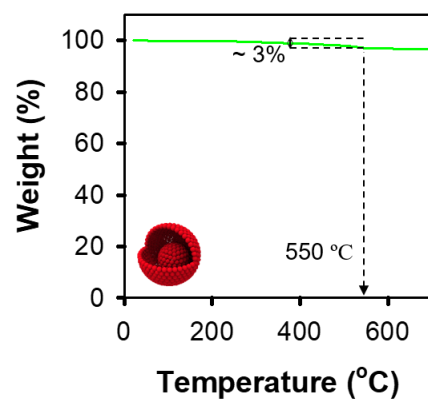

**Figure S3.** TG curve of as-prepared precursors of 5Tb-SnO<sub>2</sub> spheres.

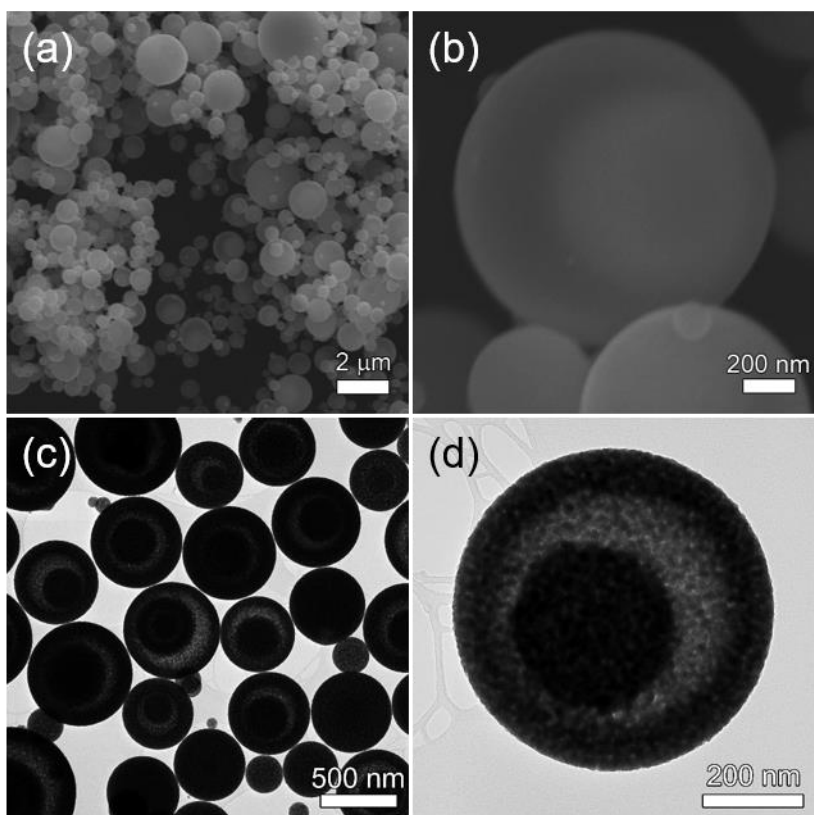

**Figure S4.** (a,b) SEM and (c,d) TEM images in pure SnO<sub>2</sub> yolk-shell spheres.

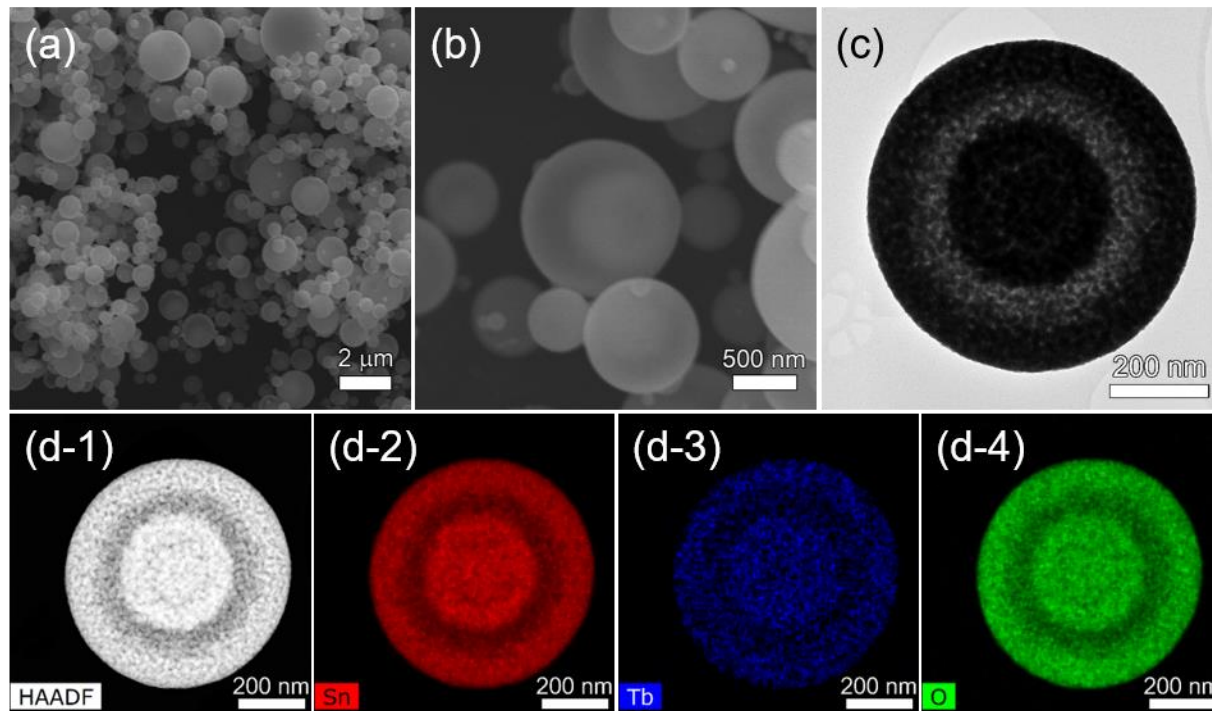

**Figure S5.** (a-c) SEM images and TEM images of 1Tb-SnO<sub>2</sub> yolk-shell spheres; (d) EDS elemental mapping of Sn, Tb, and O in 1Tb-SnO<sub>2</sub> yolk-shell spheres.

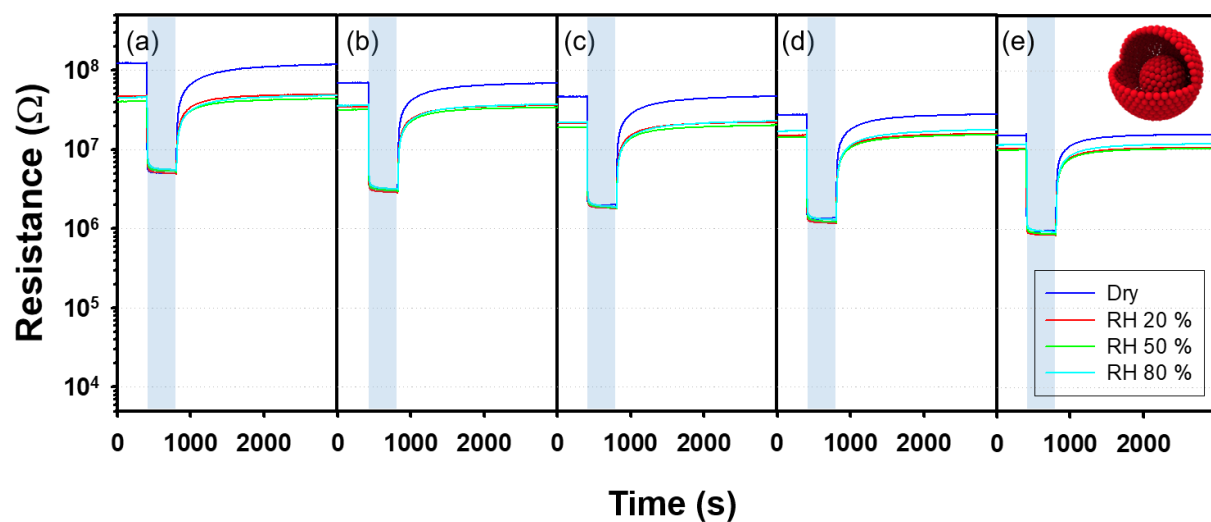

**Figure S6.** Gas-sensing transients of the 5Tb-SnO<sub>2</sub> sensor to 20 ppm of acetone at (a) 350 °C, (b) 375 °C, (c) 400 °C, (d) 425 °C and (e) 450 °C in dry and humid conditions (RH = 20, 50, 80%).

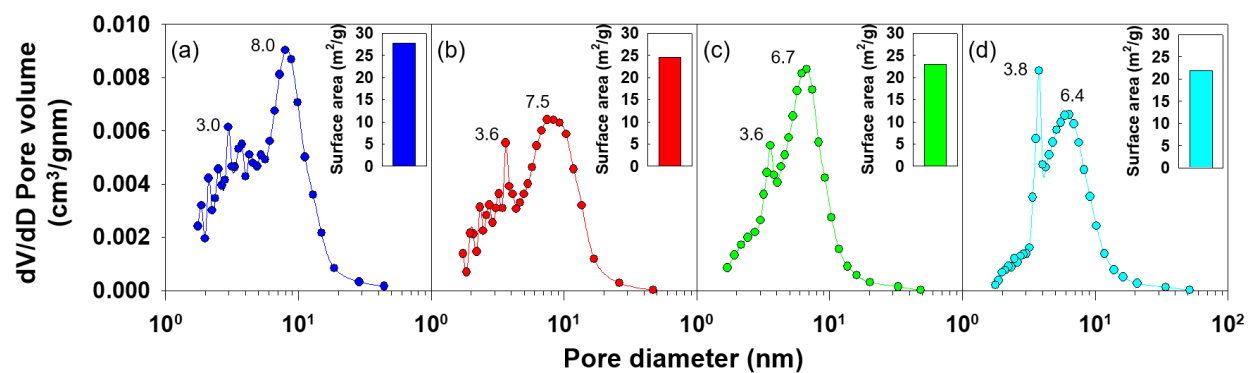

**Figure S7.** Pore-size distributions and BET specific surface areas of (a) pure  $\text{SnO}_2$ , (b) 1Tb- $\text{SnO}_2$ , (c) 5Tb- $\text{SnO}_2$ , and (d) 15Tb- $\text{SnO}_2$  yolk-shell spheres measured by  $\text{N}_2$  desorption isotherm.



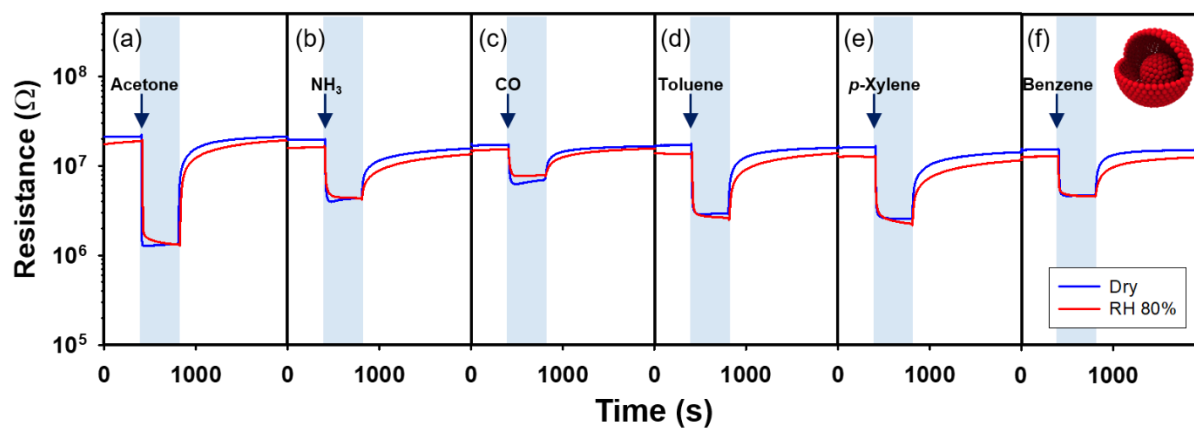

**Figure S8.** Gas-sensing transients of the 5Tb-SnO<sub>2</sub> sensor to 20 ppm of (a) acetone, (b) NH<sub>3</sub>, (c) CO, (d) toluene, (e) *p*-xylene, and (f) benzene at 450 °C in dry and humid conditions (RH = 80%).

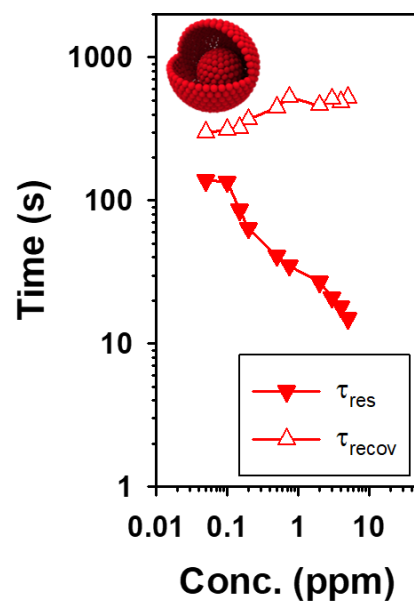

**Figure S9.** Response and recovery times of 5Tb-SnO<sub>2</sub> sensor upon exposures to acetone and air as a function of acetone concentration at 450 °C in humid condition (RH = 80%).
